# Supplementary material
Source: publisher site journal article supplement (https://www.dovepress.com/get_supplementary_file.php?f=279013.xlsx)
Supplement: Supplementary file 1 [file get_supplementary_file.php]

## Sheet: Sheet1
	COVID related publications
	article name	journal name	country	Level of EBM	impact factor	journal ranking	quartile	citations	time between received and accepted (days)	any revision done during acceptance project yes/no	number references
	Can the Coronavirus Disease 2019 (COVID-19) Affect the Eyes? A Review of Coronaviruses and Ocular Implications in Humans and Animals	Ocul Immunol Inflamm	Singapore	NA	2.231	26	Q2	27	8	yes	50
	Novel Coronavirus disease 2019 (COVID-19): The importance of recognising possible early ocular manifestation and using protective eyewear	Br J Ophthalmol	UK	5	3.615	10	Q1	54	NA	?	25
	Stepping up infection control measures in ophthalmology during the novel coronavirus outbreak: an experience from Hong Kong	Graefes Arch Clin Exp Ophthalmol	Hong Kong	NA	2.25	21	Q2	56	5	yes	26
	Characteristics of Ocular Findings of Patients With Coronavirus Disease 2019 (COVID-19) in Hubei Province, China	JAMA Ophthalmol	China	4	6.167	4	Q1	28	0	no	7
	Evaluation of coronavirus in tears and conjunctival secretions of patients with SARS-CoV-2 infection	J Med Virol	China	4	2.049	26 (of 36)	Q3	102	5	no	19
	The possibility of COVID-19 transmission from eye to nose	Acta Ophthalmol	China	NA	3.153	12	Q1	15	6	no	4
	Facing COVID-19 in Ophthalmology Department	Curr Eye Res	Italy	NA	1.672	35	Q3	0	7	yes	28
	Ocular manifestation, eye protection, and COVID-19	Graefes Arch Clin Exp Ophthalmol	China	NA	2.25	21	Q2	3	18	yes	3
	2019-nCoV transmission through the ocular surface must not be ignored	Lancet	China	NA	59.102	2 (of 160)	Q1	117	NA	?	5
	COVID-19 and Chloroquine/Hydroxychloroquine: is there Ophthalmological Concern?	Am J Ophthalmol	USA	5	4.483	6	Q1	3	NA	?	11
	The evidence of SARS-CoV-2 infection on ocular surface	Ocul Surf	China	5	9.108	2	Q1	1	20	yes	15
	Precautionary measures needed for ophthalmologists during pandemic of the coronavirus disease 2019 (COVID-19)	Acta Ophthalmol	Hong Kong	5	3.153	12	Q1	3	NA	?	8
	Ocular manifestations of a hospitalised patient with confirmed 2019 novel coronavirus disease	Br J Ophthalmol	China	5	3.615	10	Q1	7	10	yes	17
	Reply to ocular manifestation, eye protection, and COVID-19	Graefes Arch Clin Exp Ophthalmol	China	NA	2.25	21	Q2	0	6	yes	4
	COVID-19 pandemic: Lessons learned and future directions	Indian J Ophthalmol	India	NA	0.977	56	Q4	1	2	no	54
	Contact lens practice in the time of COVID-19	Cont Lens Anterior Eye	Italy	5	1.985	30	Q2	8	NA	?	21
	Coronavirus disease 2019 (COVID-19) outbreak at the Department of Ophthalmology, Oslo University Hospital, Norway	Acta Ophthalmol	Norway	NA	3.153	12	Q1	4	NA	?	4
	Assessing Viral Shedding and Infectivity of Tears in Coronavirus Disease 2019 (COVID-19) Patients	Ophthalmology	Singapore	4	7.732	3	Q1	18	NA	?	7
	A comprehensive Chinese experience against SARS-CoV-2 in ophthalmology	Eye Vis (Lond)	China	NA	2.683	17	Q2	1	5	no	47
	There may be virus in conjunctival secretion of patients with COVID-19	Acta Ophthalmol	China	NA	3.153	12	Q1	10	3	no	4
	COVID-19: Limiting the Risks for Eye Care Professionals	Ocul Immunol Inflamm	India	NA	2.231	26	Q2	0	9	yes	29
	Precaution and Prevention of Coronavirus Disease 2019 (COVID-19) Infection in the Eye	J Chin Med Assoc	Taiwan	NA	1.894	67 (of 160)	Q2	0	13	no	18
	Keratoconjunctivitis as the initial medical presentation of the novel coronavirus disease 2019 (COVID-19)	Can J Ophthalmol	Canada	5	1.305	49	Q4	1	NA	?	19
	The COVID-19 pandemic: Important considerations for contact lens practitioners	Cont Lens Anterior Eye	Canada	NA	1.985	30	Q2	0	3	yes	116
	Evaluation of ocular symptoms and tropism of SARS-CoV-2 in patients confirmed with COVID-19	Acta Ophthalmol	China	4	3.153	12	Q1	0	1	no	24
	SARS-CoV-2 may be related to conjunctivitis but not necessarily spread through the conjunctiva SARS-CoV-2 and conjunctiva	J Med Virol	China	NA	2.049	26 (of 36)	Q3	1	NA	?	12
	Ophthalmology and Glaucoma Practice in the COVID-19 Era	J Glaucoma	USA	5	1.661	36	Q3	0	NA
	Effect of COVID-19 related lockdown on ophthalmic practice and patient care in India: Results of a survey	Indian J Ophthalmol	India	NA	0.977	56	Q4	2	3	no	24
	Sustainable practice of ophthalmology during COVID-19: challenges and solutions	Graefes Arch Clin Exp Ophthalmol	Singapore	NA	2.25	21	Q2	0	8	yes	49
	[The novel coronavirus Covid-19: What are the ophthalmic risks?]	J Fr Ophtalmol	France	NA	0.557	60	Q4	0	NA	?	10
	Revisiting the dangers of the coronavirus in the ophthalmology practice	Eye (Lond)	Singapore	5	2.366	22	Q2	16	2	no	13
	COVID-19 and the eye immunity: lesson learned from the past and possible new therapeutic insights	Int Ophthalmol	UAE	NA	1.496	43	Q3	0	NA	?	18
	Preparedness among Ophthalmologists: During and Beyond the COVID-19 Pandemic	Ophthalmology	Multiple - UK	5	7.732	3	Q1	3	NA		18
	Humans, Viruses, and the Eye-An Early Report From the COVID-19 Front Line	JAMA Ophthalmol	USA	NA	6.167	4	Q1	1	NA		7
	SARS-CoV-2 Isolation From Ocular Secretions of a Patient With COVID-19 in Italy With Prolonged Viral RNA Detection	Ann Intern Med	Italy	NA	19.315	7	Q1	0	NA		5
	Ocular manifestation as first sign of Coronavirus Disease 2019 (COVID-19): Interest of telemedicine during the pandemic context	J Fr Ophtalmol	Multiple - France	NA	0.557	60	Q4	0	4	?	8
	Keeping an eye on COVID-19: Ophthalmic care and triage for general practitioners	Aust J Gen Pract	Australia	5	N/A	160	Q4	0	NA		6
	Survey of ophthalmology practitioners in A&E on current COVID-19 guidance at three Major UK Eye Hospitals	Eye (Lond)	England	5	2.366	22	Q2	0	5	Yes	5
	The prevalence of ophthalmic manifestations in COVID-19 and the diagnostic value of ocular tissue/fluid	Graefes Arch Clin Exp Ophthalmol	Indonesia	NA	2.25	24	Q2	0	2	Yes	9
	Coronavirus and ophthalmology: What do we know and way forward	Indian J Ophthalmol	India	NA	0.977	56	Q4	0	NA		12
	COVID-19 Pandemic: Ophthalmic Practice and Precautions in a Tertiary Eye Hospital in Iran	Infect Control Hosp Epidemiol	Iran	NA	2.856	48	Q2	0	NA		10
	Conjunctiva is not a preferred gateway of entry for SARS-CoV-2 to infect respiratory tract	J Med Virol	China	NA	2.049	26	Q3	2	NA	yes	10
	Precautions in ophthalmic practice in a hospital with the risk of COVID-19: experience from China	Acta Ophthalmol	China	NA	3.153	12	Q1	0	6		5
	Taking the right measures to control COVID-19 in ophthalmology: the experience of a tertiary eye care referral center in Italy	Eye (Lond)	Italy	NA	2.366	22	Q2	0	4	yes	3
	All eyes on Coronavirus-What do we need to know as ophthalmologists	Indian J Ophthalmol	India	5	0.977	56	Q4	11	NA		27
	Guidance for anti-VEGF intravitreal injections during the COVID-19 pandemic	Graefes Arch Clin Exp Ophthalmol	Multilpe - France	5	2.25	24	Q2	1	6	Yes	28
	A tribute to frontline corona warriors--Doctors who sacrificed their life while saving patients during the ongoing COVID-19 pandemic	Indian J Ophthalmol	India	NA	0.977	56	Q4	0	NA		2
	Reorganize and survive-a recommendation for healthcare services affected by COVID-19-the ophthalmology experience	Eye (Lond)	Multiple - Norway	NA	2.366	22	Q2	0	6	Yes	12
	Ophthalmology in the time of corona: Measures taken in a tertiary eye care hospital in Rajasthan against COVID-19 spread	Indian J Ophthalmol	India	NA	0.977	56	Q4	0	NA		4
	Ophthalmic clinical skills teaching in the time of COVID-19: A crisis and opportunity	Med Educ	Hong Kong	NA	4.619	2	Q1	0	NA		1
	Unilateral conjunctivitis as first presentation of Coronavirus Disease 2019 (COVID-19): A telemedicine diagnosis	J Fr Ophtalmol	France	NA	0.557	60	Q4	0	NA		0
	Practical experience on emergency ophthalmic surgery during the prevalence of COVID-19	Graefes Arch Clin Exp Ophthalmol	China	NA	2.25	24	Q2	0	13	Yes	6
	Maintenance of ophthalmic specialist out-patient service during the COVID-19 outbreak: The University of Hong Kong experience	Eye (Lond)	Hong Kong	NA	2.366	22	Q2	0	15	Yes	3
	A child confirmed COVID-19 with only symptoms of conjunctivitis and eyelid dermatitis	Graefes Arch Clin Exp Ophthalmol	China	NA	2.25	24	Q2	0	12	Yes	7
	A surge in eye clinic nonattendance under 2019 novel coronavirus outbreak	Indian J Ophthalmol	Hong Kong	NA	0.977	56	Q4	0	NA		5
	Protective shields for ophthalmic equipment to minimise droplet transmission of COVID-19	Graefes Arch Clin Exp Ophthalmol	China	NA	2.25	24	Q2	1	8	Yes	4
	Perspectives on Coronavirus Disease 2019 Control Measures for Ophthalmology Clinics Based on a Singapore Center Experience	JAMA Ophthalmol	Singapore	NA	6.167	4	Q1	0	NA		7
	Review of Hygiene and Disinfection Recommendations for Outpatient Glaucoma Care: A COVID Era Update	J Glaucoma	USA	4	1.661	36	Q3	0	4		No access
2019 publications
	article name	journal name	country	Level of evidence	impact factor	journal ranking	quartile	citations	time between received and accepted (days)	any revision done during acceptance project yes/no	number references
	A Backward Glance at Chronic Central Serous Chorioretinopathy	Ophthalmology-April-2019	US	NA	7.732	3	Q1		NA	NA	7
	battagliaparodi2019	Ophthalmology-April-2019	Italy	NA	7.732	3	Q1		NA	NA	5
	Ciliary Neurotrophic Factor Treatment Improves Retinal Structure and Function in Macular Telangiectasia Type 2	Ophthalmology-April-2019	US	NA	7.732	3	Q1		NA	NA	7
	DeepSeeNet-A Deep Learning Model for Automated Classification of Patient-based Age-related Macular Degeneration Severity from Color Fundus Photographs	Ophthalmology-April-2019	US	3	7.732	3	Q1		87	yes	55
	Editorial-Understanding uveal metastasis to the liver	Ophthalmology-April-2019	US	5	7.732	3	Q1		NA	NA	34
	Effect of an Injectable Fluocinolone Acetonide Insert on Recurrence Rates in Chronic Noninfectious Uveitis Affecting the Posterior Segment-Twelve-Month Results	Ophthalmology-April-2019	US	2	7.732	3	Q1		109	yes	23
	Effect of Ciliary Neurotrophic Factor on Retinal Neurodegeneration in Patients with Macular Telangiectasia Type 2-A Randomized Clinical Trial	Ophthalmology-April-2019	US	2	7.732	3	Q1		115	yes	26
	Evolution in the Risk of Cataract Surgical Complications among Patients Exposed to Tamsulosin	Ophthalmology-April-2019	Canada	3	7.732	3	Q1		194	yes	36
	From Machine to Machine-An OCT-Trained Deep Learning Algorithm for Objective Quantification of Glaucomatous Damage in Fundus Photographs	Ophthalmology-April-2019	US	4	7.732	3	Q1		65	yes	38
	grzybowski2019	Ophthalmology-April-2019	Poland	NA	7.732	3	Q1		NA	NA	3
	hwang2019	Ophthalmology-April-2019	US	NA	7.732	3	Q1		NA	NA	3
	Laser Treatment for Retinopathy of Prematurity-A Decade since ETROP	Ophthalmology-April-2019	Canada	4	7.732	3	Q1		NA	NA	5
	Late-Onset Rhegmatogenous Retinal Detachment Secondary to Round Holes in Avascular Retina Following Retinopathy of Prematurity	Ophthalmology-April-2019	UK	NA	7.732	3	Q1		NA	NA	0
	le2019	Ophthalmology-April-2019	US	NA	7.732	3	Q1		NA	NA	4
	Longitudinal Changes in Peripapillary Retinal Nerve Fiber Layer Thickness in High Myopia-A Prospective, Observational Study	Ophthalmology-April-2019	Korea	3	7.732	3	Q1		58	yes	29
	Long-term Visual Outcomes and Causes of Vision Loss in Chronic Central Serous Chorioretinopathy	Ophthalmology-April-2019	US	3	7.732	3	Q1		77	yes	44
	novack2019	Ophthalmology-April-2019	US	NA	7.732	3	Q1		NA	NA	5
	Progressive OCT Retinal Nerve Fiber Layer Loss in Myopia	Ophthalmology-April-2019	US	NA	7.732	3	Q1		NA	NA	5
	Pseudomelanoma (with Cataract) in a Child Caused by Amniocentesis	Ophthalmology-April-2019	US	NA	7.732	3	Q1		NA	NA	0
	Re-Hwang et al-Distinguishing highly asymmetric keratoconus eyes using combined Scheimpflug and spectral-domain OCT analysis	Ophthalmology-April-2019	Hong Kong	NA	7.732	3	Q1		NA	NA	5
	Repair of Forceps-Induced Descemet’s Rupture with Descemet’s Membrane Endothelial Keratoplasty	Ophthalmology-April-2019	Canada	NA	7.732	3	Q1		NA	NA	0
	rosenfeld2019	Ophthalmology-April-2019	US	NA	7.732	3	Q1		NA	NA	2
	Six-Month Safety and Efficacy of the Intelligent Retinal Implant System II Device in Retinitis Pigmentosa	Ophthalmology-April-2019	UK	4	7.732	3	Q1		NA	NA	5
	Spectral-Domain OCT Measurements in Alzheimer’s Disease	Ophthalmology-April-2019	China	1	7.732	3	Q1		190	yes	174
	The ARMS2 A69S Polymorphism Is Associated with Delayed Rod-Mediated Dark Adaptation in Eyes at Risk for Incident Age-Related Macular Degeneration	Ophthalmology-April-2019	US	4	7.732	3	Q1		84	yes	79
	The Effect of Anti-Vascular Endothelial Growth Factor Agents on Intraocular Pressure and Glaucoma-A Report by the American Academy of Ophthalmology	Ophthalmology-April-2019	US	1	7.732	3	Q1		0	no	41
	The Eye in Alzheimer’s Disease	Ophthalmology-April-2019	US	NA	7.732	3	Q1		NA	NA	5
	The Eyes of Oetzi-The Tyrolean Iceman Mummy	Ophthalmology-April-2019	Germany	NA	7.732	3	Q1		NA	NA	0
	The Pneumatic Retinopexy versus Vitrectomy for the Management of Primary Rhegmatogenous Retinal Detachment Outcomes Randomized Trial (PIVOT)	Ophthalmology-April-2019	Canada	2	7.732	3	Q1		71	yes	11
	Transition of Care in Ophthalmology Residency Training Programs	Ophthalmology-April-2019	US	5	7.732	3	Q1		NA	NA	14
	Use of Orthokeratology for the Prevention of Myopic Progression in Children-A Report by the American Academy of Ophthalmology	Ophthalmology-April-2019	US	1	7.732	3	Q1		0	no	62
	Using a Deep Learning Algorithm and Integrated Gradients Explanation to Assist Grading for Diabetic Retinopathy	Ophthalmology-April-2019	US	3	7.732	3	Q1		151	yes	30
	vandijk2019	Ophthalmology-April-2019	Holland	NA	7.732	3	Q1		NA	NA	5
	A Case of Unilateral Phthiriasis Palpebrarum Infestation	JAMA Ophthalmol-April-2019	China	NA	6.167	4	Q1		NA	NA	0
	Acute Phacolytic Glaucoma and Morgagnian Cataract	JAMA Ophthalmol-April-2019	Canada	NA	6.167	4	Q1		NA	NA	0
	Announcing the 150th Anniversary of JAMA Ophthalmolog	JAMA Ophthalmol-April-2019	US	NA	6.167	4	Q1		NA	NA	4
	Association Between Lamina Cribrosa Defects and	JAMA Ophthalmol-April-2019	US	3	6.167	4	Q1		NA	NA	41
	Association of Ocular Inflammation	JAMA Ophthalmol-April-2019	US	4	6.167	4	Q1		NA	NA	16
	Association of RaceEthnicity With Specific Glycemic	JAMA Ophthalmol-April-2019	US	4	6.167	4	Q1		NA	NA	6
	Association of Statin Therapy With Prevention	JAMA Ophthalmol-April-2019	Taiwan	3	6.167	4	Q1		NA	NA	35
	Asymptomatic Follicular Conjunctivitis in an Elderly Man	JAMA Ophthalmol-April-2019	US	NA	6.167	4	Q1		NA	NA	10
	Baseline Predictive Factors in Diabetic Macular Edema	JAMA Ophthalmol-April-2019	UK	NA	6.167	4	Q1		NA	NA	4
	Ciliary Body Myxoma in a 20-Year-Old Woman	JAMA Ophthalmol-April-2019	US	NA	6.167	4	Q1		NA	NA	6
	Comparison of Biphasic vs Static Oxygen Saturation Targets	JAMA Ophthalmol-April-2019	US	3	6.167	4	Q1		NA	NA	17
	Comparison of Ophthalmic Medication Prices	JAMA Ophthalmol-April-2019	US	3	6.167	4	Q1		na	na	17
	Diagnosis of a Globular Lens—A Ring in the Eye	JAMA Ophthalmol-April-2019	India	NA	6.167	4	Q1		NA	NA	3
	Effect of Ranibizumab and Aflibercept on Best-Corrected	JAMA Ophthalmol-April-2019	Australia	2	6.167	4	Q1		NA	NA	22
	Establishing Prescribing Guidelines in School-Based	JAMA Ophthalmol-April-2019	US	NA	6.167	4	Q1		NA	NA	8
	Estimates of the Percentage of US Adults With Diabetes	JAMA Ophthalmol-April-2019	US	4	6.167	4	Q1		NA	NA	15
	Factors Associated With Visual Acuity and Central Subfield	JAMA Ophthalmol-April-2019	US	2	6.167	4	Q1		NA	NA	12
	Immune Response and Intraocular Inflammation in Patients	JAMA Ophthalmol-April-2019	France	3	6.167	4	Q1		NA	NA	40
	Looking at the Lamina—More Than Meets the Eye	JAMA Ophthalmol-April-2019	US	NA	6.167	4	Q1		NA	NA	4
	Monocular Crystalline Maculopathy in a Man in His 30s	JAMA Ophthalmol-April-2019	Austria	5	6.167	4	Q1		NA	NA	4
	Moving From Syndromic Description to Etiologic Diagnosis	JAMA Ophthalmol-April-2019	US	NA	6.167	4	Q1		NA	NA	7
	Ocular Surface Squamous Neoplasia Hiding	JAMA Ophthalmol-April-2019	US	5	6.167	4	Q1		NA	NA	10
	Optic Nerve Head Edema in a Healthy Man in His 20s	JAMA Ophthalmol-April-2019	US	5	6.167	4	Q1		NA	NA	5
	Overlapping Phenotypes in Congenital Ocular Malformations	JAMA Ophthalmol-April-2019	US	NA	6.167	4	Q1		NA	NA	10
	Predictors of Spectacle Wear and Reasons for Nonwear	JAMA Ophthalmol-April-2019	UK	3	6.167	4	Q1		NA	NA	43
	Prevalence of FOXC1 Variants in Individuals	JAMA Ophthalmol-April-2019	Australia	3	6.167	4	Q1		NA	NA	29
	Retinal Hemorrhages in a Patient With Petechiae	JAMA Ophthalmol-April-2019	US	5	6.167	4	Q1		NA	NA	6
	Secondary End Points in the RIVAL Study	JAMA Ophthalmol-April-2019	UK	NA	6.167	4	Q1		NA	NA	8
	Sudden Fixed Swirl Circles in the Vision	JAMA Ophthalmol-April-2019	UK	5	6.167	4	Q1		NA	NA	9
	Swept-Source Optical Coherence Tomography Angiography	JAMA Ophthalmol-April-2019	US	NA	6.167	4	Q1		NA	NA	1
	Tailored vs Static Oxygen Saturation Targets	JAMA Ophthalmol-April-2019	Sweden	NA	6.167	4	Q1		NA	NA	7
	The Argument for Sterile Loading of All Intravitreal Injections and the Benefit of Replicated Results	JAMA Ophthalmol-April-2019	US	5	6.167	4	Q1		NA	NA	10
	The Case for Extended Screening Intervals for People	JAMA Ophthalmol-April-2019	Australia	NA	6.167	4	Q1		NA	NA	8
	Trends in Eye Care Use and Eyeglasses Affordability	JAMA Ophthalmol-April-2019	US	3	6.167	4	Q1		NA	NA	26
	Tubercular Retinal Vasculitis	JAMA Ophthalmol-April-2019	China	NA	6.167	4	Q1		NA	NA	1
	Two-Year Incidence of Retinal Intervention in Patients	JAMA Ophthalmol-April-2019	US	3	6.167	4	Q1		NA	NA	8
	Understanding Ocular Inflammation in Eyes Treated	JAMA Ophthalmol-April-2019	US	NA	6.167	4	Q1		NA	NA	6
	Management of invasive squamous cell carcinomas of the conjunctiva Treatment of	Am J Ophthalmol-April-2019	France	4	4.483	6	Q1		116	yes	27
	Tear Inflammatory Cytokines Analysis and Clinical Correlations in Diabetes and Non	Am J Ophthalmol-April-2019	China	4	4.483	6	Q1		147	yes	33
	Meibomian Gland Morphology Is a Sensitive	Am J Ophthalmol-April-2019	Norway	3	4.483	6	Q1		NA	NA	50
	Spectacle Adherence Among Four-Year-Old	Am J Ophthalmol-April-2019	US	3	4.483	6	Q1		NA	NA	23
	Vitrectomy for diabetic macular edema: optical coherence tomography criteria and	Am J Ophthalmol-April-2019	Germany	4	4.483	6	Q1		60	yes	43
	Macular Colobomata: Comparison of Clinical	Am J Ophthalmol-April-2019	India	4	4.483	6	Q1		NA	NA	30
	Incidence and risk factors for blindness in adults with diabetes: the Israeli National	Am J Ophthalmol-April-2019	Israel	3	4.483	6	Q1		127	yes	43
	Parapapillary Deep-Layer Microvasculature Dropout and Visual Field Progression in	Am J Ophthalmol-April-2019	US	3	4.483	6	Q1		157	yes	44
	Time Course of Disease Progression of PRPF31-mediated Retinitis Pigmentosa	Am J Ophthalmol-April-2019	US	4	4.483	6	Q1		124	yes	41
	Anti-IL6-Receptor Tocilizumab in Refractory	Am J Ophthalmol-April-2019	Spain	4	4.483	6	Q1		NA	NA	47
	Functional Visual Ability and Quality of Life in	Am J Ophthalmol-April-2019	US	3	4.483	6	Q1		NA	NA	16
	A Comparison of Resource Use and Costs of	Am J Ophthalmol-April-2019	US	4	4.483	6	Q1		NA	NA	22
	Age-dependent Changes in the Macular	Am J Ophthalmol-April-2019	US	3	4.483	6	Q1		NA	NA	57
	Risk of Stroke After Nonarteritic Anterior	Am J Ophthalmol-April-2019	South Korea	3	4.483	6	Q1		NA	NA	26
	Long-term Safety and Ocular Hypotensive	Am J Ophthalmol-April-2019	US	2	4.483	6	Q1		NA	NA	35
	Five-year trends in multifocal electroretinogram for patients with birdshot	Am J Ophthalmol-April-2019	France	3	4.483	6	Q1		4	yes	49
	Expression of Nod-like Receptors and Clinical	Am J Ophthalmol-April-2019	South Korea	4	4.483	6	Q1		NA	NA	64
	Extended (Every 12 Weeks or Longer) Dosing	Am J Ophthalmol-April-2019	US	2	4.483	6	Q1		NA	NA	14
	Predictors of Falls per Step and Falls per Year At	Am J Ophthalmol-April-2019	US	3	4.483	6	Q1		NA	NA	35
	Acute Vascular Ischemic Events in Patients With	Am J Ophthalmol-April-2019	US	3	4.483	6	Q1		NA	NA	41
	Anatomic, Visual, and Financial Outcomes for	Am J Ophthalmol-April-2019	US	4	4.483	6	Q1		NA	NA	37
	Development of pediatric eye questionnaires for children with eye disease	Am J Ophthalmol-April-2019	US	4	4.483	6	Q1		116	yes	32
	Five-Year Cumulative Incidence and Risk Factors	Am J Ophthalmol-April-2019	Finland	3	4.483	6	Q1		NA	NA	24
	Programmed Cell Death 1 Ligand 1 and	Am J Ophthalmol-April-2019	US	4	4.483	6	Q1		na	na	34
	Incidence and Ocular Features of Pediatric Myasthenias	Am J Ophthalmol-April-2019	US	3	4.483	6	Q1		NA	NA	19
	Corneal Epithelial Thickness Intrasubject	Am J Ophthalmol-April-2019	Spain	3	4.483	6	Q1		NA	NA	25
	Peripapillary Versus Macular Combined	Am J Ophthalmol-April-2019	US	3	4.483	6	Q1		NA	NA	11
	Diabetes Alone Does Not Impair	Am J Ophthalmol-April-2019	Poland	NA	4.483	6	Q1		NA	NA	5
	Optical Coherence Tomography	Am J Ophthalmol-April-2019	Portugal	NA	4.483	6	Q1		NA	NA	7
	Auckland Cataract Study III	Am J Ophthalmol-April-2019	US	NA	4.483	6	Q1		NA	NA	5
	Stroke Risk and Risk Factors in	Am J Ophthalmol-April-2019	US	NA	4.483	6	Q1		NA	NA	5
	Stroke Risk and Risk Factors in CRAO	Am J Ophthalmol-April-2019	US	NA	4.483	6	Q1		NA	NA	6
	Diabetes Alone Does Not Impair recovery from uneventful cataract surgery	Am J Ophthalmol-April-2019	Finland	NA	4.483	6	Q1		NA	NA	8
	Auckland Cataract Study III-refining	Am J Ophthalmol-April-2019	New Zealand	NA	4.483	6	Q1		NA	NA	6
